# Supplementary material
Source: MDPI journal article supplement (https://www.mdpi.com/2409-515X/8/4/58)
Supplement: s1 [file s1]

## Worksheet 2. CFTR Mutations

See instructions for Worksheet 2.

| CFTR Genotype ( <i>mutation 1/mutation 2; TG Tract-Poly T 1/TG Tract-Poly T 2</i> ) | Number |
|-------------------------------------------------------------------------------------|--------|
|-------------------------------------------------------------------------------------|--------|

|                                        |       |
|----------------------------------------|-------|
| F508del/F508del                        | _____ |
| F508del/G542X                          | _____ |
| F508del/R117H; (TG)11-9T/(TG)13-5T     | _____ |
| F508del/R117H; (TG)11-9T/(TG)12-5T     | _____ |
| F508del/R117H; Unknown TG Tract-Poly T | _____ |
| F508del/Unknown                        | _____ |
| Unknown/Unknown                        | _____ |

*(please list all other genotypes below; use additional sheets as needed)*

|       |       |
|-------|-------|
| _____ | _____ |
| _____ | _____ |
| _____ | _____ |
| _____ | _____ |
| _____ | _____ |
| _____ | _____ |
| _____ | _____ |
| _____ | _____ |
| _____ | _____ |
| _____ | _____ |
| _____ | _____ |
| _____ | _____ |
| _____ | _____ |
| _____ | _____ |
| _____ | _____ |
| _____ | _____ |
| _____ | _____ |
| _____ | _____ |
| _____ | _____ |
| _____ | _____ |
| _____ | _____ |
| _____ | _____ |

See instructions for Worksheet 2.

[illegible]
