# Supplementary material
Source: MDPI journal article supplement (https://www.mdpi.com/2409-515X/8/4/58)
Supplement: s1 [file s1]

## Worksheet 1. Hospital Information

**IMPORTANT NOTE:** See instructions for Worksheet 1; use additional sheets as needed.

| Hospital Code | Name/Address                         | Number of CF cases at or above cut-off from Section 3 | Number of newborns receiving IRT testing from Section 4 |
|---------------|--------------------------------------|-------------------------------------------------------|---------------------------------------------------------|
| _____         | Name _____<br>City _____ State _____ | _____                                                 | _____                                                   |
| _____         | Name _____<br>City _____ State _____ | _____                                                 | _____                                                   |
| _____         | Name _____<br>City _____ State _____ | _____                                                 | _____                                                   |
| _____         | Name _____<br>City _____ State _____ | _____                                                 | _____                                                   |
| _____         | Name _____<br>City _____ State _____ | _____                                                 | _____                                                   |
| _____         | Name _____<br>City _____ State _____ | _____                                                 | _____                                                   |
| _____         | Name _____<br>City _____ State _____ | _____                                                 | _____                                                   |
| _____         | Name _____<br>City _____ State _____ | _____                                                 | _____                                                   |
| _____         | Name _____<br>City _____ State _____ | _____                                                 | _____                                                   |
| _____         | Name _____<br>City _____ State _____ | _____                                                 | _____                                                   |
| _____         | Name _____<br>City _____ State _____ | _____                                                 | _____                                                   |
