# Supplementary material
Source: MDPI journal article supplement (https://www.mdpi.com/2409-515X/8/4/58)
Supplement: s1 [file s1]

## Section 4. All Screened Newborns

**IMPORTANT NOTE:** Please answer all questions referring only to the time period starting with the date in Question 8 and ending on 12/31/12.

For questions 75-96, provide the number of newborns receiving IRT testing in each category. If your state does not collect the requested data item, enter "DC" in the "Unknown" field.

75. Total newborns receiving IRT testing \_\_\_\_\_
76. Child's sex      Male \_\_\_\_\_ Female \_\_\_\_\_ Unknown \_\_\_\_\_
77. Child's race: White      Yes \_\_\_\_\_ No \_\_\_\_\_ Unknown \_\_\_\_\_
78. Child's race: Black      Yes \_\_\_\_\_ No \_\_\_\_\_ Unknown \_\_\_\_\_
79. Child's race: Other      Yes \_\_\_\_\_ No \_\_\_\_\_ Unknown \_\_\_\_\_
80. Child's ethnicity      Hispanic \_\_\_\_\_ Non-Hispanic \_\_\_\_\_ Unknown \_\_\_\_\_
81. Hospital of birth *(Complete Worksheet 1, last column with the number of newborns receiving IRT Testing in each hospital.)*
82. Day of week birth occurred
- Sun \_\_\_\_\_ Mon \_\_\_\_\_ Tue \_\_\_\_\_ Wed \_\_\_\_\_
- Thu \_\_\_\_\_ Fri \_\_\_\_\_ Sat \_\_\_\_\_ Unknown \_\_\_\_\_
83. Gestational age at birth (completed weeks)
- <34 \_\_\_\_\_ 35-36 \_\_\_\_\_ 37-41 \_\_\_\_\_ >41 \_\_\_\_\_ Unknown \_\_\_\_\_
84. Birth weight (grams)
- <1500 \_\_\_\_\_ 1500-2499 \_\_\_\_\_ 2500+ \_\_\_\_\_ Unknown \_\_\_\_\_

For states using a 2 specimen IRT-IRT or IRT-IRT-DNA screening model, Questions 85-96 should be answered for both specimens, as specified in the table.

- |                                                    | <u>Specimen 1</u>                                            | <u>Specimen 2</u> |
|----------------------------------------------------|--------------------------------------------------------------|-------------------|
| 85. Median age of children at specimen collection  | _____ hours                                                  | _____ hours       |
| 86. Median age of children at time of IRT analysis | _____ days                                                   | _____ days        |
| 87. Month of specimen collection                   |                                                              |                   |
| Specimen 1:                                        | Jan _____ Feb _____ Mar _____ Apr _____ May _____ June _____ |                   |
|                                                    | July _____ Aug _____ Sep _____ Oct _____ Nov _____ Dec _____ |                   |
| Specimen 2:                                        | Jan _____ Feb _____ Mar _____ Apr _____ May _____ June _____ |                   |
|                                                    | July _____ Aug _____ Sep _____ Oct _____ Nov _____ Dec _____ |                   |

|                                          | <u>Specimen 1</u> | <u>Specimen 2</u> |
|------------------------------------------|-------------------|-------------------|
| 88. Median IRT value                     | _____ ng/mL       | _____ ng/mL       |
| 89. Median IRT value cut point used      | _____ ng/mL       | _____ ng/mL       |
| 90. Median IRT percentile                | _____             | _____             |
| 91. Median IRT percentile cut point used | _____             | _____             |

Questions 92-95 refer to the period from birth to the time of specimen collection:

|                                  | <u>Specimen 1</u>        | <u>Specimen 2</u>        |
|----------------------------------|--------------------------|--------------------------|
| 92. Infant Feedings              | _____ Breast only        | _____ Breast only        |
|                                  | _____ Formula only       | _____ Formula only       |
|                                  | _____ Breast and formula | _____ Breast and formula |
|                                  | _____ Unknown            | _____ Unknown            |
| 93. Red Blood Cell Transfusion   | _____ Yes                | _____ Yes                |
|                                  | _____ No                 | _____ No                 |
|                                  | _____ Unknown            | _____ Unknown            |
| 94. Intravenous Nutrition        | _____ Yes                | _____ Yes                |
|                                  | _____ No                 | _____ No                 |
|                                  | _____ Unknown            | _____ Unknown            |
| 95. Neonatal Intensive Care Unit | _____ Yes                | _____ Yes                |
|                                  | _____ No                 | _____ No                 |
|                                  | _____ Unknown            | _____ Unknown            |

96. Information on IRT Kit Lots used (*Complete Worksheet 3*)
