# Supplementary material
Source: MDPI journal article supplement (https://www.mdpi.com/2409-515X/8/4/58)
Supplement: s1 [file s1]

### Section 3. CF Cases At or Above the IRT Cut Off Value

**IMPORTANT NOTE:** Please answer all questions referring only to the time period starting with the date in Question 8 and ending on 12/31/12.

For questions 47-74, provide the number of CF cases at or above the IRT cut-off value in each category. If your state does not collect the requested data item, enter "DC" in the "Unknown" field.

47. Total CF Cases at or above IRT cut off (*see instructions for Section 3 for definition*) \_\_\_\_\_
48. Child's sex      Male \_\_\_\_\_ Female \_\_\_\_\_ Unknown \_\_\_\_\_
49. Child's race: White      Yes \_\_\_\_\_ No \_\_\_\_\_ Unknown \_\_\_\_\_
50. Child's race: Black      Yes \_\_\_\_\_ No \_\_\_\_\_ Unknown \_\_\_\_\_
51. Child's race: Other      Yes \_\_\_\_\_ No \_\_\_\_\_ Unknown \_\_\_\_\_
52. Child's ethnicity      Hispanic \_\_\_\_\_ Non-Hispanic \_\_\_\_\_ Unknown \_\_\_\_\_
53. Hospital of Birth (*Complete all but last column in Worksheet 1 with the number of CF Cases at or above the IRT cut-off in each hospital.*)
54. Day of week birth occurred  
Sun \_\_\_\_\_ Mon \_\_\_\_\_ Tue \_\_\_\_\_ Wed \_\_\_\_\_  
Thu \_\_\_\_\_ Fri \_\_\_\_\_ Sat \_\_\_\_\_ Unknown \_\_\_\_\_
55. Gestational age at birth (completed weeks)  
<34 \_\_\_\_\_ 35-36 \_\_\_\_\_ 37-41 \_\_\_\_\_ >41 \_\_\_\_\_ Unknown \_\_\_\_\_
56. Birth weight (grams) <1500 \_\_\_\_\_ 1500-2499 \_\_\_\_\_ 2500+ \_\_\_\_\_ Unknown \_\_\_\_\_
57. Meconium ileus      Yes \_\_\_\_\_ No \_\_\_\_\_ Unknown \_\_\_\_\_
58. CFTR mutations  
Not genotyped \_\_\_\_\_  
Genotyped (*provide count of each genotype on Worksheet 2*) \_\_\_\_\_  
Unknown if genotyped \_\_\_\_\_
59. Age at CF diagnosis (days)  
<29 \_\_\_\_\_ 29-56 \_\_\_\_\_ 57-84 \_\_\_\_\_ 85-112 \_\_\_\_\_ 113-130 \_\_\_\_\_  
131-158 \_\_\_\_\_ >158 \_\_\_\_\_ Unknown \_\_\_\_\_
60. CF diagnosis suggested by newborn screening      Yes \_\_\_\_\_ No \_\_\_\_\_ Unknown \_\_\_\_\_
61. CF diagnosis suggested by family history      Yes \_\_\_\_\_ No \_\_\_\_\_ Unknown \_\_\_\_\_
62. CF diagnosis suggested by symptoms      Yes \_\_\_\_\_ No \_\_\_\_\_ Unknown \_\_\_\_\_
63. CF diagnosis suggested by  
CF prenatal/carrier screening      Yes \_\_\_\_\_ No \_\_\_\_\_ Unknown \_\_\_\_\_

For states using a 2-specimen IRT-IRT or IRT-IRT-DNA screening model, Questions 62-75 should be answered for both specimens, as specified in the table. Provide information only for the specimen(s) used to make the CF NBS interpretation.

|                                                    | <u>Specimen 1</u>                                            | <u>Specimen 2</u> |
|----------------------------------------------------|--------------------------------------------------------------|-------------------|
| 64. Median age of children at specimen collection  | _____ hours                                                  | _____ hours       |
| 65. Median age of children at time of IRT analysis | _____ days                                                   | _____ days        |
| 66. Month of specimen collection                   |                                                              |                   |
| <b>Specimen 1:</b>                                 | Jan _____ Feb _____ Mar _____ Apr _____ May _____ June _____ |                   |
|                                                    | July _____ Aug _____ Sep _____ Oct _____ Nov _____ Dec _____ |                   |
| <b>Specimen 2:</b>                                 | Jan _____ Feb _____ Mar _____ Apr _____ May _____ June _____ |                   |
|                                                    | July _____ Aug _____ Sep _____ Oct _____ Nov _____ Dec _____ |                   |

|                                                                                    | <u>Specimen 1</u> | <u>Specimen 2</u> |
|------------------------------------------------------------------------------------|-------------------|-------------------|
| 67. Median IRT value                                                               | _____ ng/mL       | _____ ng/mL       |
| 68. IRT value cut point used<br>(provide median, if multiple cut points used)      | _____ ng/mL       | _____ ng/mL       |
| 69. Median IRT percentile                                                          | _____             | _____             |
| 70. IRT percentile cut point used<br>(provide median, if multiple cut points used) | _____             | _____             |

Questions 71-74 refer to the period from birth to the time of specimen collection:

|                                  |                                                                                      |                                                                                      |
|----------------------------------|--------------------------------------------------------------------------------------|--------------------------------------------------------------------------------------|
| 71. Infant Feedings              | _____ Breast only<br>_____ Formula only<br>_____ Breast and formula<br>_____ Unknown | _____ Breast only<br>_____ Formula only<br>_____ Breast and formula<br>_____ Unknown |
| 72. Red Blood Cell Transfusion   | _____ Yes<br>_____ No<br>_____ Unknown                                               | _____ Yes<br>_____ No<br>_____ Unknown                                               |
| 73. Intravenous Nutrition        | _____ Yes<br>_____ No<br>_____ Unknown                                               | _____ Yes<br>_____ No<br>_____ Unknown                                               |
| 74. Neonatal Intensive Care Unit | _____ Yes<br>_____ No<br>_____ Unknown                                               | _____ Yes<br>_____ No<br>_____ Unknown                                               |
