# Supplementary material
Source: MDPI journal article supplement (https://www.mdpi.com/2409-515X/8/4/58)
Supplement: s1 [file s1]

### Worksheet 3. Information about IRT Kit Lots

See instructions for Worksheet 3; use additional sheets as needed.

| IRT Kit Lot # | Dates used | Specimen (check one)                | Number of newborns tested in lot from Section 4 | IRT lot Median value | Number of CF Cases from Section 3 |
|---------------|------------|-------------------------------------|-------------------------------------------------|----------------------|-----------------------------------|
|               |            | <input type="checkbox"/> Specimen 1 |                                                 | ng/mL                |                                   |
|               |            | <input type="checkbox"/> Specimen 2 |                                                 |                      |                                   |
|               |            | <input type="checkbox"/> Specimen 1 |                                                 | ng/mL                |                                   |
|               |            | <input type="checkbox"/> Specimen 2 |                                                 |                      |                                   |
|               |            | <input type="checkbox"/> Specimen 1 |                                                 | ng/mL                |                                   |
|               |            | <input type="checkbox"/> Specimen 2 |                                                 |                      |                                   |
|               |            | <input type="checkbox"/> Specimen 1 |                                                 | ng/mL                |                                   |
|               |            | <input type="checkbox"/> Specimen 2 |                                                 |                      |                                   |
|               |            | <input type="checkbox"/> Specimen 1 |                                                 | ng/mL                |                                   |
|               |            | <input type="checkbox"/> Specimen 2 |                                                 |                      |                                   |
|               |            | <input type="checkbox"/> Specimen 1 |                                                 | ng/mL                |                                   |
|               |            | <input type="checkbox"/> Specimen 2 |                                                 |                      |                                   |
|               |            | <input type="checkbox"/> Specimen 1 |                                                 | ng/mL                |                                   |
|               |            | <input type="checkbox"/> Specimen 2 |                                                 |                      |                                   |
|               |            | <input type="checkbox"/> Specimen 1 |                                                 | ng/mL                |                                   |
|               |            | <input type="checkbox"/> Specimen 2 |                                                 |                      |                                   |
|               |            | <input type="checkbox"/> Specimen 1 |                                                 | ng/mL                |                                   |
|               |            | <input type="checkbox"/> Specimen 2 |                                                 |                      |                                   |
|               |            | <input type="checkbox"/> Specimen 1 |                                                 | ng/mL                |                                   |
|               |            | <input type="checkbox"/> Specimen 2 |                                                 |                      |                                   |
|               |            | <input type="checkbox"/> Specimen 1 |                                                 | ng/mL                |                                   |
|               |            | <input type="checkbox"/> Specimen 2 |                                                 |                      |                                   |
|               |            | <input type="checkbox"/> Specimen 1 |                                                 | ng/mL                |                                   |
|               |            | <input type="checkbox"/> Specimen 2 |                                                 |                      |                                   |
|               |            | <input type="checkbox"/> Specimen 1 |                                                 | ng/mL                |                                   |
|               |            | <input type="checkbox"/> Specimen 2 |                                                 |                      |                                   |
|               |            | <input type="checkbox"/> Specimen 1 |                                                 | ng/mL                |                                   |
|               |            | <input type="checkbox"/> Specimen 2 |                                                 |                      |                                   |
|               |            | <input type="checkbox"/> Specimen 1 |                                                 | ng/mL                |                                   |
|               |            | <input type="checkbox"/> Specimen 2 |                                                 |                      |                                   |
|               |            | <input type="checkbox"/> Specimen 1 |                                                 | ng/mL                |                                   |
|               |            | <input type="checkbox"/> Specimen 2 |                                                 |                      |                                   |
