# Supplementary material
Source: MDPI journal article supplement (https://www.mdpi.com/2409-515X/8/4/58)
Supplement: s1 [file s1]

## Section 2. CF Cases Below the IRT Cut Off Value

**IMPORTANT NOTE:** Complete a separate Section 2 (Questions 16-46) for each CF case in Question 9 below the IRT cutoff value during the time period starting with the date in Question 8 and ending on 12/31/12.

Case (State's coded reference number for tracking purposes) \_\_\_\_\_

16. Child's sex ☐ M ☐ F ☐ Unk    17. Was child part of a multiple birth? ☐ Y ☐ N ☐ Unk  
18. Child's race: White? ☐ Y ☐ N ☐ Unk    19. Child's race: Black? ☐ Y ☐ N ☐ Unk  
20. Child's race: other? ☐ Y ☐ N ☐ Unk    21. Child's ethnicity: Hispanic? ☐ Y ☐ N ☐ Unk  
22. Hospital of birth Name \_\_\_\_\_

City \_\_\_\_\_ State \_\_\_\_\_

23. Day of week birth occurred ☐ Sun ☐ M ☐ T ☐ W ☐ Th ☐ F ☐ Sat ☐ Unk  
24. Gestational age at birth \_\_\_\_\_ weeks \_\_\_\_\_ days  
25. Birth weight \_\_\_\_\_ grams    26. Meconium ileus ☐ Y ☐ N ☐ Unk  
27. CFTR mutations genotype (mutation 1/mutation 2; TG Tract Poly T 1/TG Tract Poly T 2)

28. Age at CF diagnosis \_\_\_\_\_ days    29. Sweat chloride test value (list highest) \_\_\_\_\_ mEq/L  
30. CF diagnosis suggested by family history? ☐ Y ☐ N ☐ Unk  
31. CF diagnosis suggested by symptoms? ☐ Y ☐ N ☐ Unk  
32. CF diagnosis suggested by CF prenatal/carrier screening? ☐ Y ☐ N ☐ Unk  
33. List any non-CF disorders that were present \_\_\_\_\_

|                                          | <u>Specimen 1</u> | <u>Specimen 2</u> | <u>Retest</u> |
|------------------------------------------|-------------------|-------------------|---------------|
| 34. Age of child at specimen collection  | _____ hours       | _____ hours       | _____ hours   |
| 35. Age of child at time of IRT analysis | _____ days        | _____ days        | _____ days    |
| 36. Month of specimen collection         | _____             | _____             | _____         |
| 37. IRT value                            | _____ ng/mL       | _____ ng/mL       | _____ ng/mL   |
| 38. IRT value cut point used             | _____ ng/mL       | _____ ng/mL       | _____ ng/mL   |
| 39. IRT percentile                       | _____             | _____             | _____         |
| 40. IRT percentile cut point used        | _____             | _____             | _____         |
| 41. IRT Kit Lot Number                   | _____             | _____             | _____         |
| 42. IRT Kit Lot median value             | _____ ng/mL       | _____ ng/mL       | _____ ng/mL   |

Questions 43-46 refer to the period from birth to the time of specimen collection

43. Infant feedings (select one) ☐ breast only ☐ Unk ☐ breast only ☐ Unk ☐ breast only ☐ Unk  
☐ formula only ☐ formula only ☐ formula only  
☐ breast and formula ☐ breast and formula ☐ breast and formula  
44. Red blood cell transfusion ☐ Y ☐ N ☐ Unk ☐ Y ☐ N ☐ Unk ☐ Y ☐ N ☐ Unk  
45. Intravenous nutrition ☐ Y ☐ N ☐ Unk ☐ Y ☐ N ☐ Unk ☐ Y ☐ N ☐ Unk  
46. Neonatal Intensive Care Unit ☐ Y ☐ N ☐ Unk ☐ Y ☐ N ☐ Unk ☐ Y ☐ N ☐ Unk
